# Supplementary material
Source: Copernicus journal article supplement (doi:10.5194/bg-23-3253-2026)
Supplement: Supplementary file 1 [file bg-23-3253-2026-supplement.pdf]

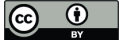

*Supplement of*

**Benthic phosphorus cycling in the northern Benguela upwelling system: excess P supply and altered pelagic nutrient stoichiometry**

**Peter Kraal et al.**

*Correspondence to:* Peter Kraal ([peter.kraal@nioz.nl](mailto:peter.kraal@nioz.nl))

The copyright of individual parts of the supplement might differ from the article licence.

12 pages

1 tables

11 Figures

### **S1. Total N and P measurements in water-column and pore-water samples**

- 5 An unfiltered 10-mL water sample from a CTD-rosette bottle was directly transferred into a pre-rinsed 15-mL polypropylene centrifuge tube, the second 10-mL sample was filtered over an acid-cleaned 0.2- $\mu\text{m}$  PES filter into a pre-rinsed 15-mL polypropylene centrifuge tube. These stations represent the contrasting depositional environments of the oxygenated slope (Station 2) and the strongly TOC-enriched shelf (Station 6). At NIOZ, these samples were analysed for total N and P by AA preceded by digestion of (particulate) organic compounds using persulfate oxidation and UV irradiation.
- 10 Analysis of total dissolved N and P in addition to DIN and  $\text{HPO}_4^{2-}$  in pore-water at stations 2 and 6 allowed the estimation of pore-water DON and DOP pools (Fig. S1). Total dissolved N and thus the DON pool was only quantified in pore-water from station 2, where it represented a significant dissolved N pool: 10–45  $\mu\text{mol L}^{-1}$ , ~25–50 % of total dissolved N. Dissolved organic P was determined in station 2 and 6 pore-waters and was a much smaller pool than DON, both in absolute and relative terms. We first note that DOP, calculated as the difference between total dissolved P and  $\text{HPO}_4^{2-}$ , often resulted in
- 15 negative numbers, indicating that there was no detectable DOP pool. This applied to most measured samples from station 6, where total dissolved P and  $\text{HPO}_4^{2-}$  concentrations were high, making a calculation by difference of a small P pool challenging. Where calculated DOP values were positive (mostly station 2 samples where P concentrations were relatively low), DOP ranged between 0.3 and 3.5  $\mu\text{mol L}^{-1}$ , accounting for 1–10 % of total dissolved P.

20

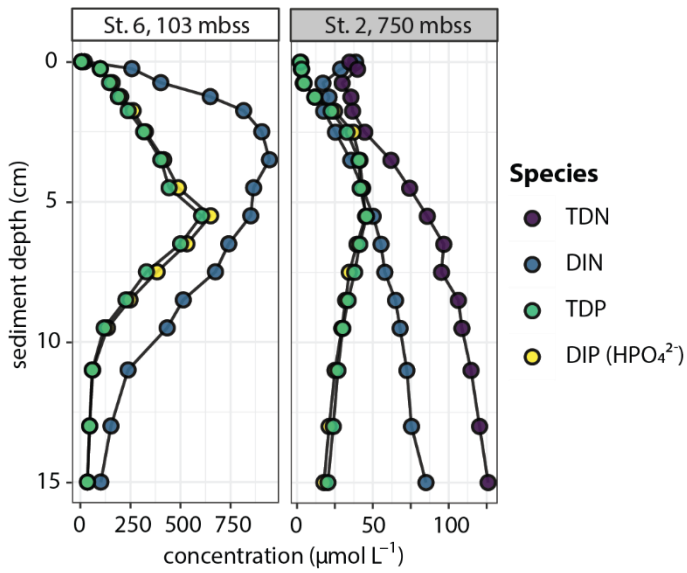

**Figure S1:** Pore-water profiles of total dissolved nitrogen (TDN), dissolved inorganic nitrogen (DIN), total dissolved phosphorus (TDP) and dissolved inorganic phosphorus ( $\text{HPO}_4^{2-}$ , or DIP) in pore-waters at stations 2 and 6. TDN for station 6 was not determined.

25

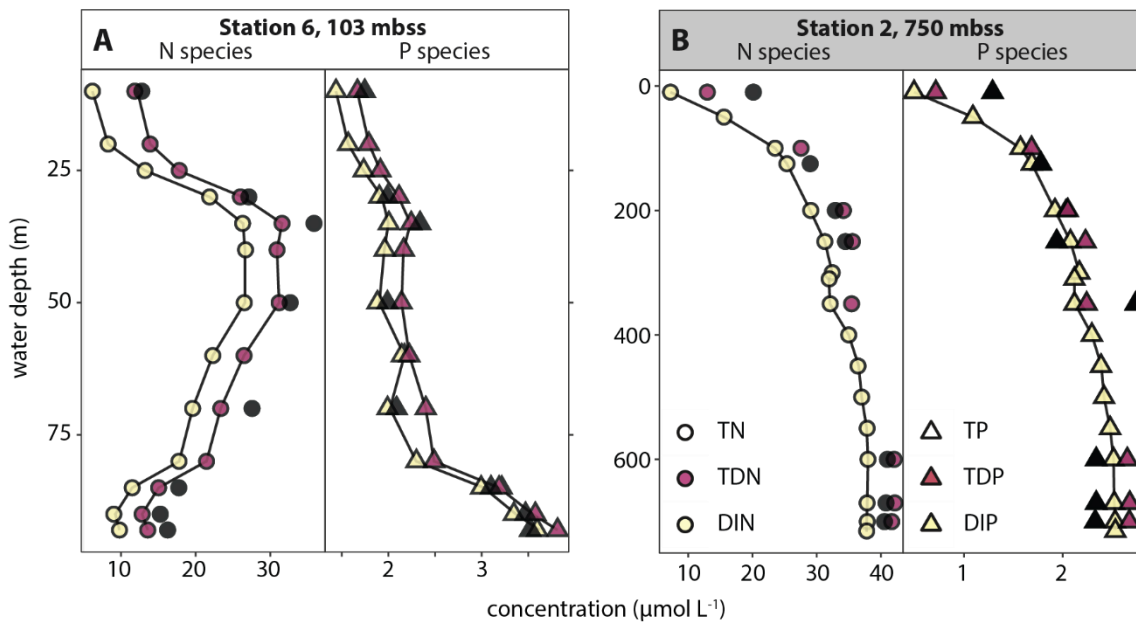

**Figure S2:** Water-column profiles of total (TN, TP), total dissolved (TDN, TDP) and total dissolved inorganic N and P (DIN, DIP).

## S2. Dissolved oxygen micro-profiling at the sediment-water interface

For O<sub>2</sub> micro-profiling with micro-sensors, the readings of the microamperometer were converted to % air saturation using a temperature calibration at 100 % saturation (seawater bubbled with air for 20 min and then rested under very gentle stirring to avoid oversaturation).

**Table S1. Temperature calibration of oxygen micro-sensor in seawater at 100% air saturation and atmospheric pressure.**

| Temp (°C) | Signal (pA) |          |             |
|-----------|-------------|----------|-------------|
|           | <i>1</i>    | <i>2</i> | <i>mean</i> |
| 5         | 275         | 276      | 275.5       |
| 13        | 246         | 247      | 246.5       |
| 22        | 207         | 208      | 207.5       |

From this, we obtained:  $nA_{100\% \text{ air sat}} = -4.0069 * \text{temp}_{\text{°C}} + 296.6$  ( $R^2 = 0.9974$ ). Taking the bottom-water temperature from the CTD measurements at each station, we calculated the maximum sensor response. Further, using standard relationships between O<sub>2</sub> concentration, temperature and salinity, we calculated the maximum bottom-water O<sub>2</sub> concentration in  $\mu\text{mol L}^{-1}$  for each station. Assuming a linear relationship between [O<sub>2</sub>] and sensor signal, we then obtained the O<sub>2</sub> micro-profiles in  $\mu\text{mol L}^{-1}$ . Using the O<sub>2</sub> gradient in the diffusive boundary layer, we then calculated the diffusive sediment O<sub>2</sub> uptake (Jørgensen et al., 2022):

$$DBL \text{ flux} = D \times \frac{dc}{dz} \quad (\text{S1})$$

where  $D$  is the molecular diffusion coefficient of O<sub>2</sub> at the relevant temperature and salinity (calculated with the *marelac* package in Rstudio) and  $dC/dz$  is the vertical O<sub>2</sub> gradient.

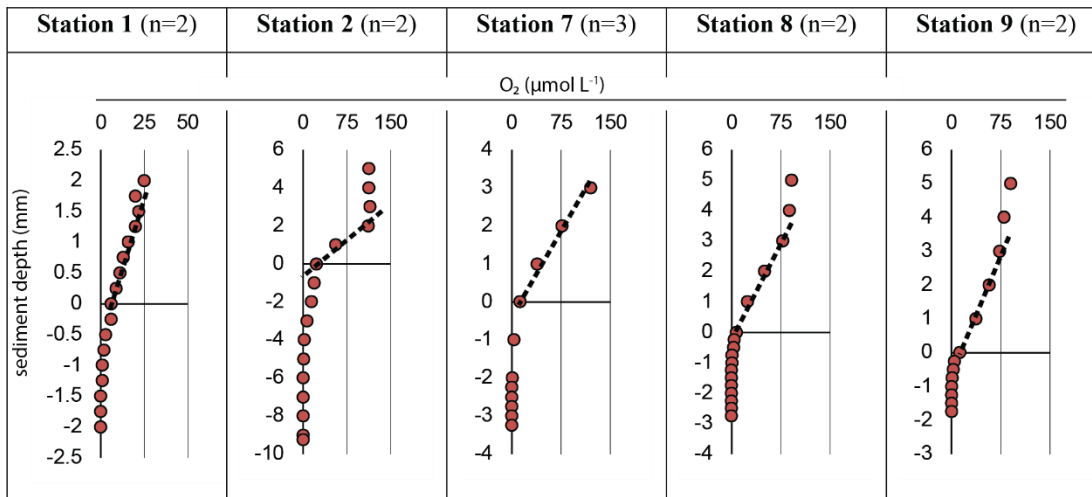

50 **Figure S3.** Dissolved O<sub>2</sub> micro-profiling around the sediment-water interface. No robust data could be collected for the stations on the oxygen-depleted shelf, likely due to intrusion of atmospheric oxygen. The thick black dashed line indicates the O<sub>2</sub> gradient around the SWI from which the diffusive O<sub>2</sub> uptake was calculated. Note that the unit of the y-axis, sediment depth, is in mm.

### S3. Calculation of excess pore-water HPO<sub>4</sub><sup>2-</sup>

With principles outlined in Burdige and Komada (2011) and adapted by Jilbert et al. (2020), we used the measured pore-water NH<sub>4</sub><sup>+</sup> profile to calculate the expected dissolved HPO<sub>4</sub><sup>2-</sup> profile that would result from breakdown of algal organic matter with Redfield N/P stoichiometry (16) (Redfield, 1958) and simple accumulation of the released HPO<sub>4</sub><sup>2-</sup> in the pore-water:

$$d\Delta NH_4^+ / d\Delta H_2PO_4^{2-} = -r_{N:P} \times D_{H_2PO_4^{2-}} / D_{NH_4^+}, \quad (S2)$$

60 where  $d\Delta[\text{species}]$  represents pore-water concentration gradient over depth,  $r_{N:P}$  represents expected molar ratio of N:P in remineralized organic matter (assumed to be 16), and  $D_{\text{species}}$  represents sediment diffusion coefficients of HPO<sub>4</sub><sup>2-</sup> and NH<sub>4</sub><sup>+</sup>, calculated at in situ temperature, salinity and pressure in R package marelac and corrected for sediment porosity.

#### S4. Visual observation of white, filamentous sulfur-oxidizing bacteria

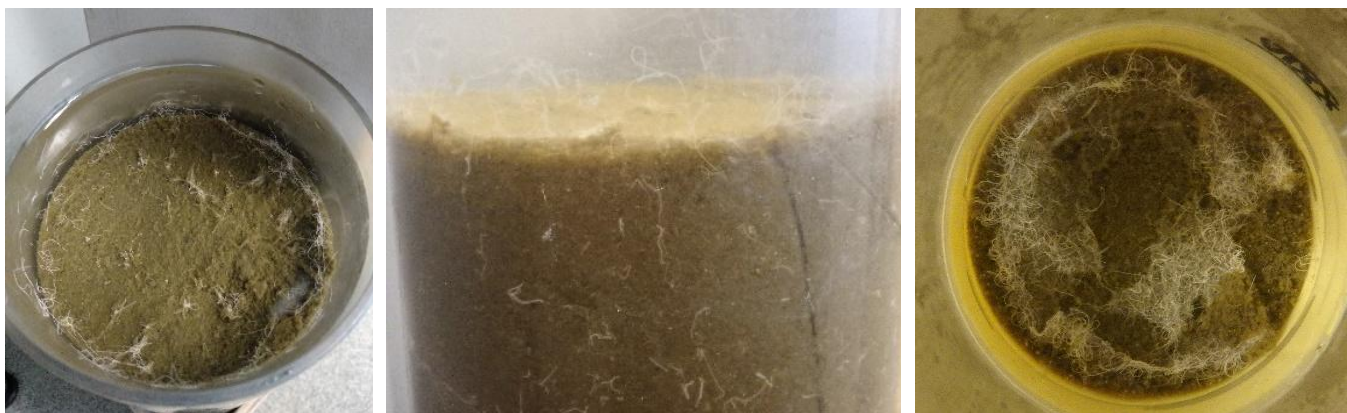

65 **Figure S4.** Images of white filamentous microbes, likely sulfur-oxidizing bacteria, observed in core tops from stations 4, 5 and 6 on the oxygen-depleted shelf (~ 100 – 105 mbss). The middle image shows occurrence up to a few centimetres into the sediment.

#### S5. Correlations between benthic fluxes

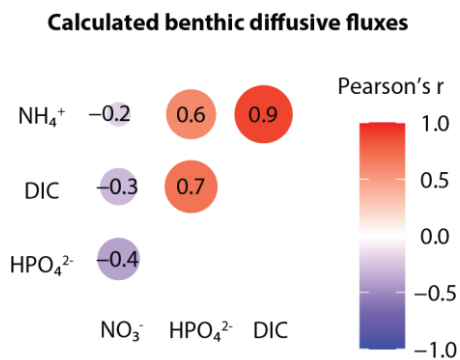

**Figure S5.** Correlation matrix for calculated diffusive benthic fluxes of C, N and P.

70

75

## S6. Whole-core incubations and benthic fluxes

### S6.1 Time series of C, N and P in the overlying water

80 The consumption or accumulation of key dissolved species over time in whole-core incubations was determined by taking discrete, filtered samples of the overlying water over time. Low-quality data was already pruned from this dataset prior to further processing. For flux calculations, subsequently a threshold  $R^2$  of  $\pm 0.3$  was applied to discard time series that did not show a robust increasing or decreasing trend.

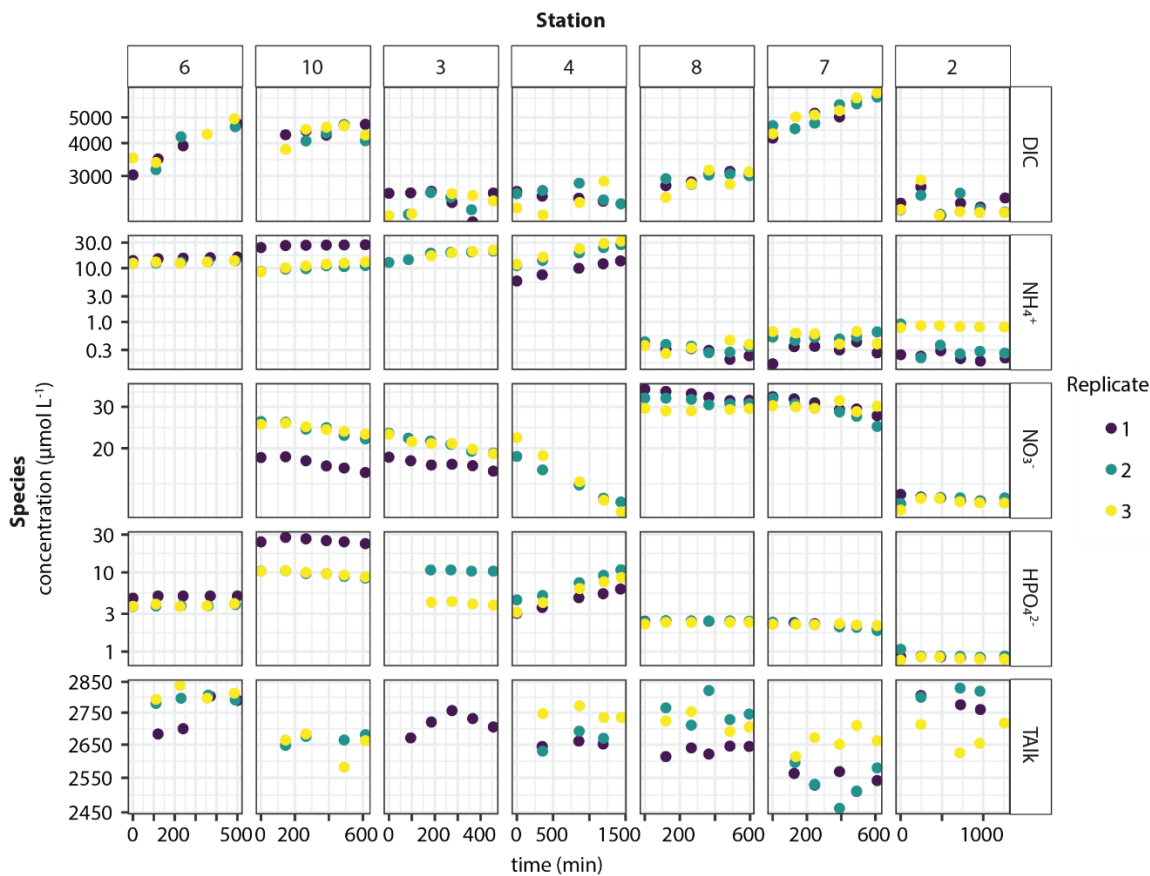

Figure S6. Time series of concentrations of key species in overlying water during whole-core incubations.

85

### S6.2 Time series of dissolved O<sub>2</sub> in the overlying water

Dissolved O<sub>2</sub> in the overlying water during whole-core incubation at selected stations was monitored at high temporal resolution (every 2 minutes) using a Presens fiber optic system. Limited reliable data were gathered from the triplicate cores, particularly for shelf stations where bottom-water oxygen was (very) low. Below, we show data for station with more or less

90 oxygenated bottom waters. For station 3, we the O<sub>2</sub> time series showed relatively high concentrations (starting from 20-25% air saturation while bottom water was ~5% air-saturated), which indicates that O<sub>2</sub> had entered the incubation cores during preparation of the incubation experiment. These higher O<sub>2</sub> levels may have stimulated oxic respiration and the O<sub>2</sub> consumption rate for station 3 is therefore treated with caution. We note that the resulting O<sub>2</sub> of ~15 mmol m<sup>-2</sup> d<sup>-1</sup> is similar to rates found on the Namibian shelf during in-situ incubation (Chuang et al., 2022).

95

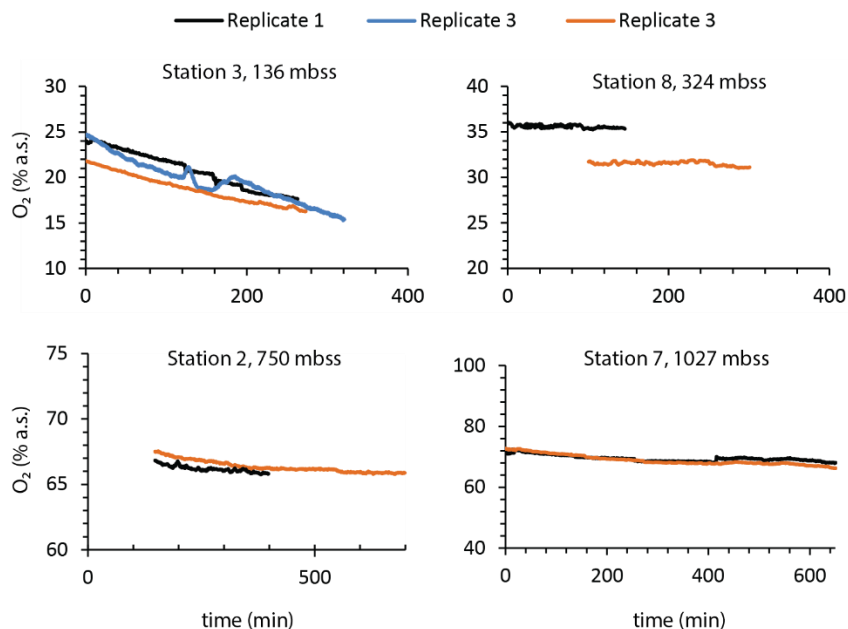

Figure S7. Time series of dissolved O<sub>2</sub> in overlying water during whole-core incubations.

### S6.3 Whole-core and diffusive flux calculations

100 Concentration changes of O<sub>2</sub>, DIC, TALK, NH<sub>4</sub><sup>+</sup>, NO<sub>3</sub><sup>-</sup> and HPO<sub>4</sub><sup>2-</sup> in the overlying water in combination with elapsed time, sediment area and volume of overlying water were used to calculate whole-core (total) benthic fluxes:

$$F_i = \Delta C / \Delta t \times V / A \quad (S3)$$

105 where  $F_i$  is the measured flux of analyte  $i$  (mmol m<sup>-2</sup> d<sup>-1</sup>),  $\Delta C / \Delta t$  is the rate of concentration change (μmol L<sup>-1</sup> d<sup>-1</sup>) measured in the overlying water,  $V$  is the volume of overlying water (dm<sup>3</sup>), and  $A$  is the area of sediment surface in the core (dm<sup>2</sup>).

Measured whole-core-incubation fluxes of DIC, TAlk,  $\text{NH}_4^+$ ,  $\text{NO}_3^-$  and  $\text{HPO}_4^{2-}$  were compared to diffusive fluxes calculated using pore-water and bottom-water profiles for selected elements with Fick's First Law:

110

$$J_i = -\varphi \times D_{sed} \times \delta C / \delta z \quad (\text{S4})$$

where  $J_i$  is the calculated diffusive flux of the element  $i$  ( $\text{mmol m}^{-2} \text{d}^{-1}$ );  $\varphi$  is the sediment porosity ( $\text{cm}^3 \text{cm}^{-3}$ ) calculated from gravimetric water content;  $D_{sed}$  is the sediment diffusion coefficient for the analyte at ambient temperature ( $\text{s cm}^{-2}$ ), pressure and salinity calculated using the *R* package *marelac* corrected for sediment tortuosity (Burdige, 2006);  $\delta C / \delta z$  is the concentration gradient across the sediment-water interface ( $\text{mmol cm}^{-4}$ ). The latter was calculated from the analyte's concentration in the bottom water (overlying water) and first pore-water sample (0.5 cm sediment depth). As described in S1, diffusive  $\text{O}_2$  fluxes were calculated using the obtained micro-profiles across the SWI.

120 The diffusive DIC fluxes were similar to oxygen and sulphate consumption rates, respectively, on the shelf ( $9\text{--}25 \text{ mmol m}^{-2} \text{d}^{-1}$ ) and slope ( $-2\text{--}8 \text{ mmol m}^{-2} \text{d}^{-1}$ ).

#### S6.4 Whole-core and diffusive DIC and TAlk fluxes

The diffusive DIC fluxes were similar to oxygen and sulphate consumption rates, respectively, on the shelf ( $9\text{--}25 \text{ mmol m}^{-2} \text{d}^{-1}$ ) and slope ( $-2\text{--}8 \text{ mmol m}^{-2} \text{d}^{-1}$ ). The DIC and TAlk fluxes were similar, except at station 6 where the diffusive TAlk flux  
125 ( $50 \text{ mmol m}^{-2} \text{d}^{-1}$ ) was much larger than the DIC flux ( $24 \text{ mmol m}^{-2} \text{d}^{-1}$ ). There was a marked difference between the calculated and measured DIC fluxes with highly variable measured DIC fluxes that were particularly high for stations 6 and 7 ( $100\text{--}1500 \text{ mmol m}^{-2} \text{d}^{-1}$ ). The accompanying TAlk fluxes were about an order of magnitude lower.

The DIC fluxes were up to two orders of magnitude higher than calculated fluxes and those measured in other upwelling areas, particularly at stations 6, 10 and 7. Furthermore, diffusive fluxes of TAlk were similar to diffusive DIC fluxes but  
130 measured TAlk fluxes were one or two orders of magnitude lower. These extremely high DIC fluxes seem robust as they were similar in triplicate corer incubations (see also Fig. S6) but are difficult to explain. The observation that DIC fluxes far exceed TAlk fluxes makes  $\text{CaCO}_3$  dissolution unlikely, rather it suggests that aerobic OM degradation and associated  $\text{CO}_2$  production plays an important role in shaping the DIC flux. We note that stations 6 and 7, with the highest DIC fluxes, also show the strongest dissolved  $\text{H}_4\text{SiO}_4$  enrichment in the bottom water; we propose that this may indicate a role for localized  
135 deposition and rapid degradation of sinking diatoms. Sediment chemistry and TOC content on the NBUS shelf is strongly impacted by the deposition of dead biomass from diatom blooms (Calvert and Price, 1983; Bremner, 1978; Borchers et al., 2005).

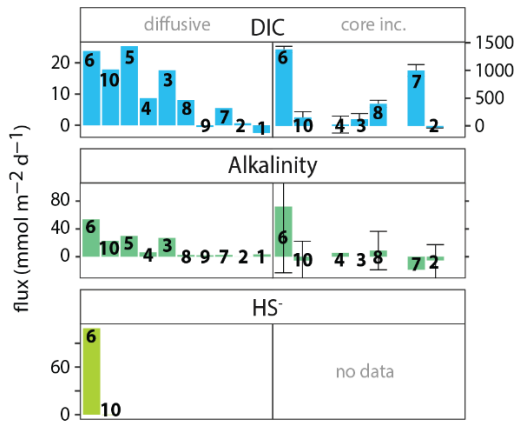

140

Fig. S8: Benthic fluxes of DIC, TALK and  $\text{HS}^-$  across the sediment-water interface: negative fluxes are directed into the sediment, positive fluxes are directed into the bottom water. Left panels: calculated fluxes using concentration gradient in the diffusive boundary layer ( $\text{O}_2$ ) or the gradient between bottom water and uppermost pore-water sample at 0.25 cm depth (all other species). Right panels: measured benthic fluxes calculated from changes in bottom-water chemistry during whole-core incubations. For measured fluxes, mean values and standard deviation of replicate core incubations are shown.

145

## S7. Bottom-water chemistry

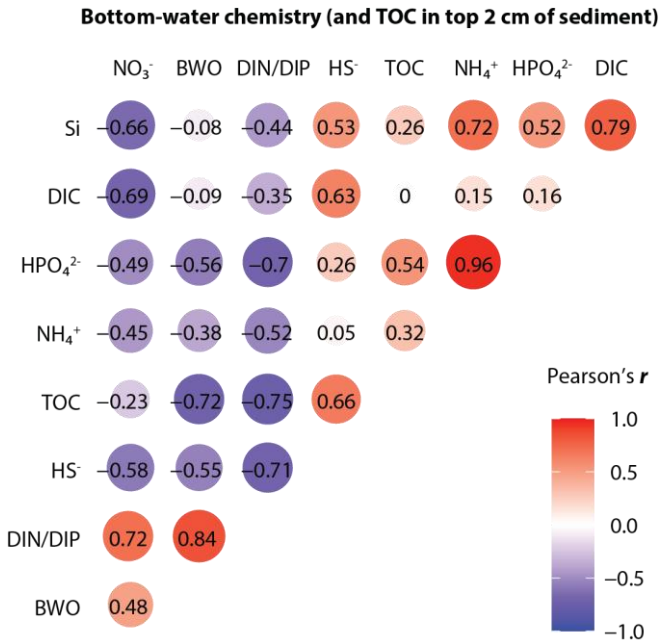

Figure S9. Correlation plot for bottom-water parameters and TOC content in the top 2 cm of the sediment.

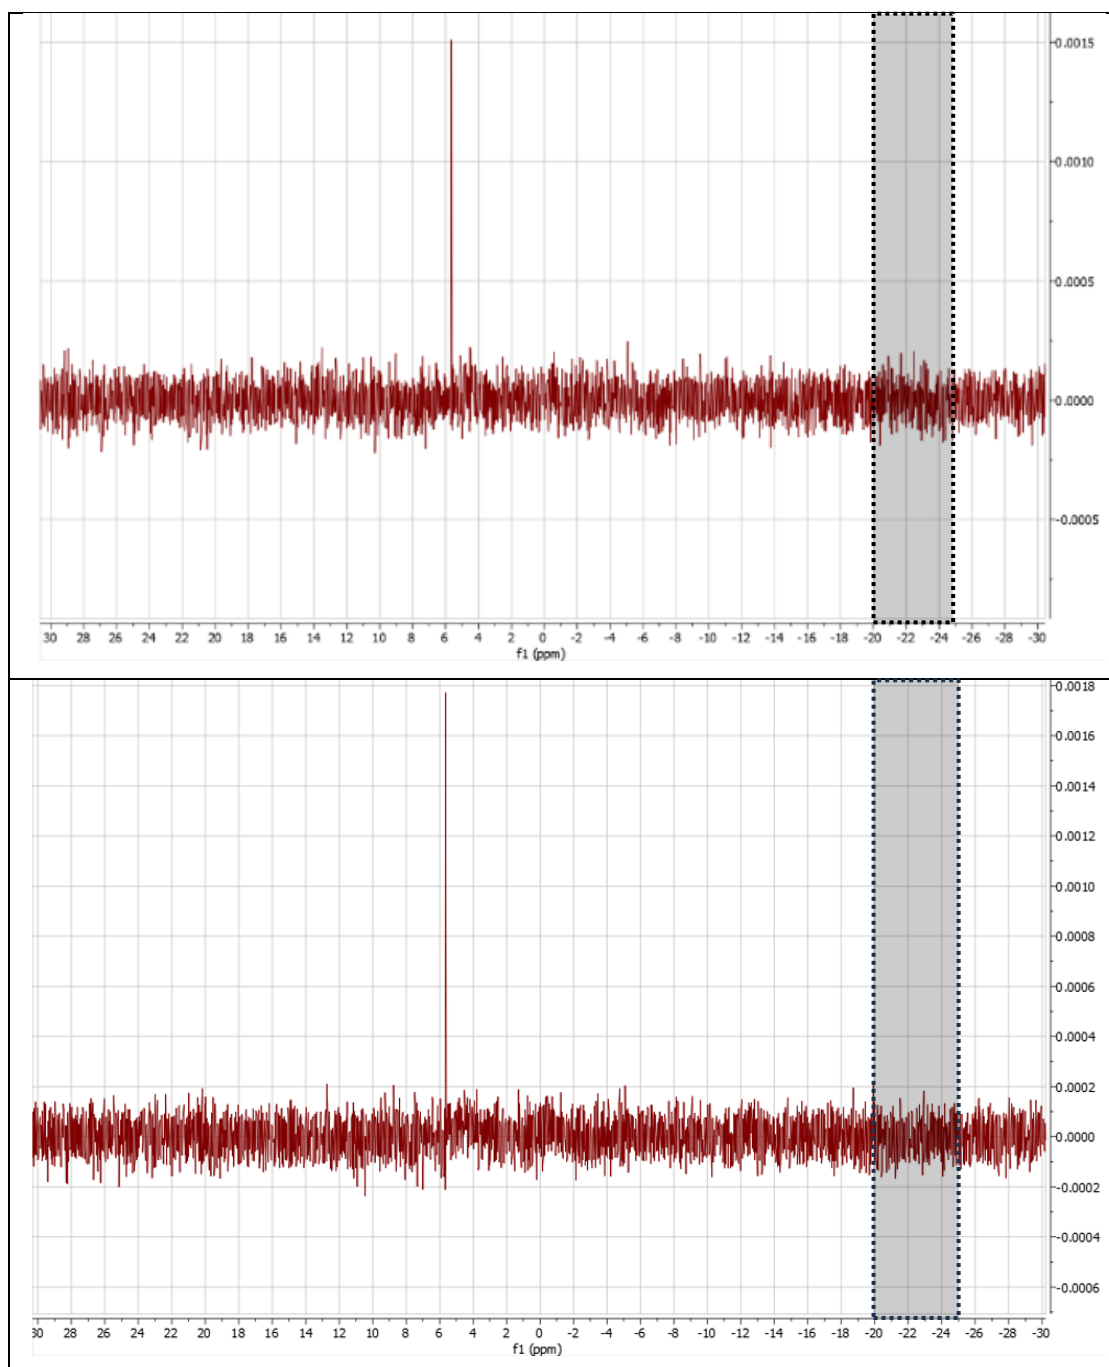

**Figure S10.** Liquid-state  $^{31}\text{P}$ -NMR results for 1 M NaOH extracts of sediment (2-3 cm depth) from station 6 (top) and 2 (bottom). An orthophosphate peak is clearly visible at ~6 ppm, no evidence for poly-P which would be expressed as peaks around -20 – -25 ppm (indicated by grey area with dashed outline).

## S9. Genetic analysis and results

155 DNA samples from station 2 (0–2 cm), station 4 (0–1 cm), station 6 (0–1 cm), and station 7 (0–1 cm) were extracted using the DNeasy PowerSoil Pro Kit (QIAGEN, Germany) following the manufacturer's instructions. Extracted DNA was pooled per station and was used for microbial community profiling through 16S rRNA gene amplicon sequencing using a Bacterial 16S rRNA gene primer set targeting the V3-V4 region (357F: TACGGGAGGCAGCAG / 800R: CCAGGGTATCTAATCC) (Kisand et al., 2002; Turner et al., 1999). Amplicon libraries were sequenced using Illumina MiSeq technology with a 2 ×  
 160 250 bp paired end read configuration. Sequence data were processed using the CASCABEL pipeline (Abdala Asbun et al., 2020), with quality control, denoising, and chimera removal, and identification of amplicon sequence variants (ASVs). Taxonomic assignment was performed on the resulting chimera-free ASVs using the assignTaxonomy function in DADA2, and the classifier was trained against the SILVA reference database, specifically version NR99, v.138.1. Results are shown in Fig. S8, below. There were no counts in any of the sample extracts for the order of Thiotrichales, to which sulfide-  
 165 oxidizing bacteria such as Thiomargarita, Thioploca and Beggiatoa belong.

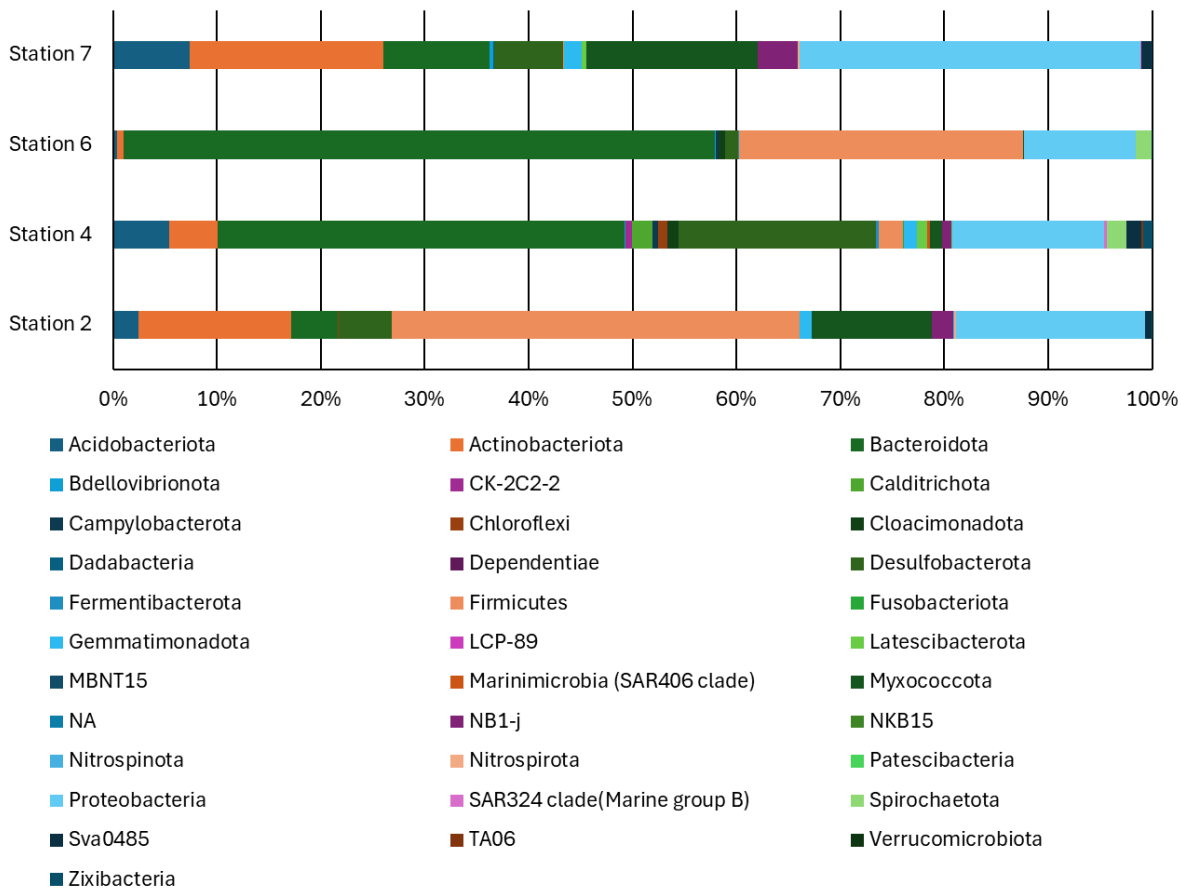

Fig. S11. Genetic results for selected surface samples from the shelf (station 4, 6) and the slope below the perennial OMZ (station 2, 7).

## References

- 170 Borchers, S. L., Schnetger, B., Böning, P., and Brumsack, H.-J.: Geochemical signatures of the Namibian diatom belt: Perennial upwelling and intermittent anoxia, *Geochem. Geophys. Geosyst.*, 6, doi:10.1029/2004GC000886, 2005.
- Bremner, J. M.: Sediments on the continental margin off South West Africa between latitudes 17° and 25° S, 1978.
- Burdige, D. J.: Geochemistry of marine sediments, Princeton University Press 2006.
- Burdige, D. J. and Komada, T.: Anaerobic oxidation of methane and the stoichiometry of remineralization processes in continental margin sediments, *Limnol. Oceanogr.*, 56, 1781–1796, <https://doi.org/10.4319/lo.2011.56.5.1781>, 2011.
- 175 Calvert, S. E. and Price, N. B.: Geochemistry of Namibian Shelf Sediments, in: Coastal Upwelling Its Sediment Record: Part A: Responses of the Sedimentary Regime to Present Coastal Upwelling, edited by: Suess, E., and Thiede, J., Springer US, Boston, MA, 337–375, 10.1007/978-1-4615-6651-9\_17, 1983.
- Chuang, P.-C., Anderson, C. H., Kossack, M., Fabian, J., Su, C.-C., Vosteen, P., Zabel, M., Scholz, F., Schulz-Vogt, H. N., Sommer, S., and Dale, A. W.: Nutrient turnover by large sulfur bacteria on the Namibian mud belt during the low productivity season, *Frontiers in Marine Science*, Volume 9 - 2022, 10.3389/fmars.2022.929913, 2022.
- 180 Jilbert, T., Jokinen, S., Saarinen, T., Mattus-Kumpunen, U., Simojoki, A., Saarni, S., Salminen, S., Niemistö, J., and Horppila, J.: Impacts of a deep reactive layer on sedimentary phosphorus dynamics in a boreal lake recovering from eutrophication, *Hydrobiologia*, 847, 4401–4423, 10.1007/s10750-020-04289-9, 2020.
- 185 Jørgensen, B. B., Wenzhöfer, F., Egger, M., and Glud, R. N.: Sediment oxygen consumption: Role in the global marine carbon cycle, *Earth-Sci. Rev.*, 228, 103987, <https://doi.org/10.1016/j.earscirev.2022.103987>, 2022.
- Kisand, V., Cuadros, R., and Wikner, J.: Phylogeny of culturable estuarine bacteria catabolizing riverine organic matter in the northern Baltic Sea, *Appl. Environ. Microb.*, 68, 379–388, 10.1128/aem.68.1.379-388.2002, 2002.
- Redfield, A. C.: The biological control of chemical factors in the environment, *Am. Sci.*, 46, 205–222, 1958.
- 190 Turner, S., Pryer, K. M., Miao, V. P., and Palmer, J. D.: Investigating deep phylogenetic relationships among cyanobacteria and plastids by small subunit rRNA sequence analysis, *J Eukaryot Microbiol*, 46, 327–338, 10.1111/j.1550-7408.1999.tb04612.x, 1999.
